# Supplementary material for: Iron Deficiency in Cystic Fibrosis: A Cross-Sectional Single-Centre Study in a Referral Adult Centre
Source: MDPI journal article supplement (doi:10.3390/nu14030673), 2022-02-05
Supplement: s1 [file s1]

[illegible]

|       |        |
|-------|--------|
| DF508 | N1303K |
| DF508 | R1162X |
| DF508 | R1162X |
| DF508 | R117H  |
| DF508 | R347P  |
| DF508 | R553X  |
| DF508 | R553X  |
| DF508 | R553X  |
| DF508 | W1282X |
| DF508 | W401   |
| DF508 | Y1092X |
| DF508 | Y122X  |

| mut1          | mut2              |
|---------------|-------------------|
| 1525 - 1G>A   | 1525 - 1G>A       |
| 2347 del G    | K52X              |
| 2711 del T    | 2711 del T        |
| 3272-26A>G    | 3272-26A>G        |
| 5T            | 5T                |
| 5T            | indéterminé       |
| 5T            | indéterminé       |
| 711 + 1G>T    | G576A             |
| CFTR dele 2,3 | H199R             |
| E585X         | R1066C            |
| G139D         | 2183 AA>G         |
| G542X         | R347P             |
| G542X         | TR dele 14b - 17b |
| G542X         | R347P             |
| G542X         | G628R (G>A)       |
| H199R         | N1303K            |
| L227R         | L227R             |
| N1303K        | 2789 + 5G>A       |
| N1303K        | DF508             |
| R334W         | N1101K            |
| R334W         | M1101K            |
| R553X         | 2789 + 5G>A       |
| W1282X        | 1677delTA         |
